# Supplementary material for: Toward highly efficient CdS/CdSe quantum dots-sensitized solar cells incorporating ordered photoanodes on transparent conductive substrates
Source: Royal Society of Chemistry journal article supplement (doi:10.1039/c2cp40568g), 2012-01-01
Supplement: c2cp40568g.pdf [file c2cp40568g.pdf]

Electronic Supplementary Information

**Toward highly efficient CdS/CdSe quantum dots-sensitized solar cells  
incorporating with ordered photoanodes on transparent conductive substrates**

Quan-Xin Zhang, Guo-Ping Chen, Yue-Yong Yang, Xi Shen, Yi-Duo Zhang, Chun-Hui Li, Ri-Cheng Yu, Yan-Hong

Luo, Dong-Mei Li\*, Qing-Bo Meng\*

*Beijing National Laboratory for Condensed Matter Physics, Institute of Physics, Chinese Academy of Sciences,  
Beijing 100190, China, Fax & Tel : +86-10-82649242, E-mail: qbmeng@iphy.ac.cn and dmli@iphy.ac.cn*

## Experimental section

### Characterization

The UV-vis transmittance spectra were obtained on Shimadzu UV-2550.

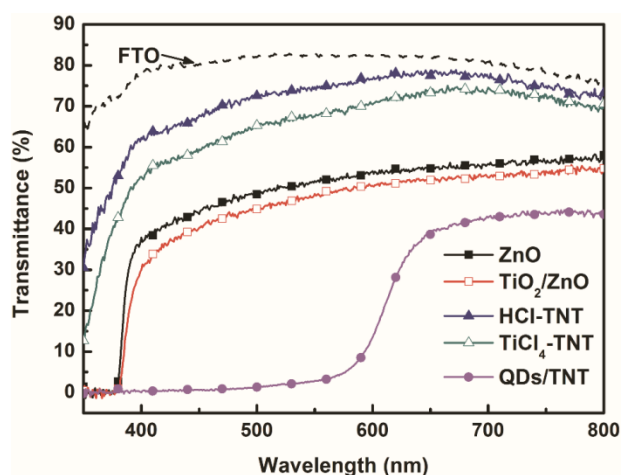

**Figure S1.** UV-vis transmittance spectra of ZnO nanorod arrays, ZnO/TiO<sub>2</sub> core/shell nanostructure, HCl-TNTs, and TiCl<sub>4</sub>-TNTs before and after QDs deposition, in comparison with the transmittance spectrum of bare FTO.

Different aligned nanostructures, including ZnO nanorods, ZnO/TiO<sub>2</sub> core/shell nanostructure, HCl-TNT and TiCl<sub>4</sub>-TNT arrays are further investigated by transmittance spectra. As shown in Figure S1, for the ZnO nanorods, its transmittance is about 50% between 350 nm and 800 nm due to its light-scattering effect, whereas a sharp decrease at 400 nm is due to its intrinsic absorption. After being coated by TiO<sub>2</sub> shell, the film is white and its transmittance slightly reduces since larger diameters of TiO<sub>2</sub> coated nanorods will lead to stronger light-scattering effect. Further etching off the ZnO template affords TNT arrays, the film becomes semi-transparent and its transmittance significantly enhances to about 70% in the range of visible light. After TiCl<sub>4</sub> treatment, the transmittance of TNTs slightly decreases because thicker wall of TNT arrays. When CdS/CdSe QDs are successively deposited on TiCl<sub>4</sub>-TNT arrays, strong absorption in the visible light range will bring about very low transmittance of the film (nearly zero) below 600 nm.
